# Supplementary material for: The Inflammatory Feed-Forward Loop Triggered by the Complement Component C3 as a Potential Target in Endometriosis
Source: PubMed Central journal article supplement (PMC8418148; doi:10.3389/fimmu.2021.693118), 2021-08-13
Supplement: DataSheet_1.pdf [file DataSheet_1.pdf]

## *Supplementary Material*

### 1.1 Supplementary Figures

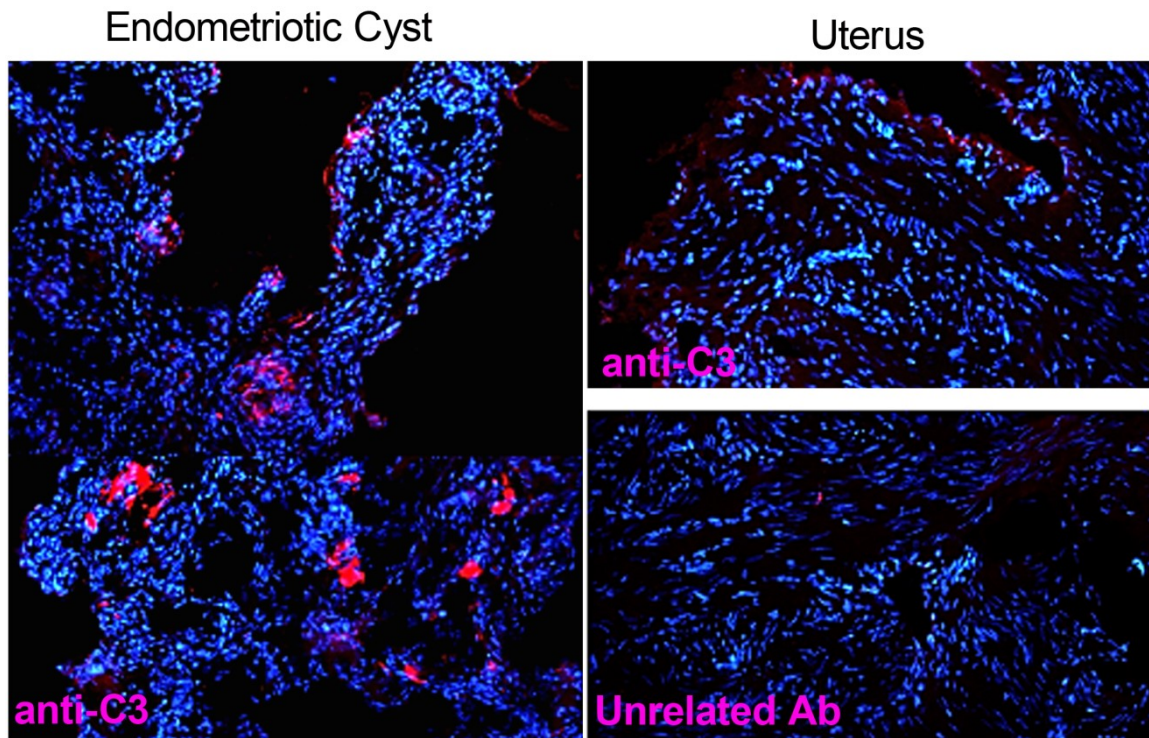

**Supplementary Figure 1.** Immunofluorescence localization of C3 in endometrial eutopic (Uterus, right part) and ectopic tissue (Endometriotic Cyst, left part) using frozen sections. C3 stained (in red; with goat anti-human C3; Quidel, Rome, Italy) strongly in endometriotic cyst section compared to normal uterus. The nuclei were counter-stained in blue with DAPI (original magnification 100 x).

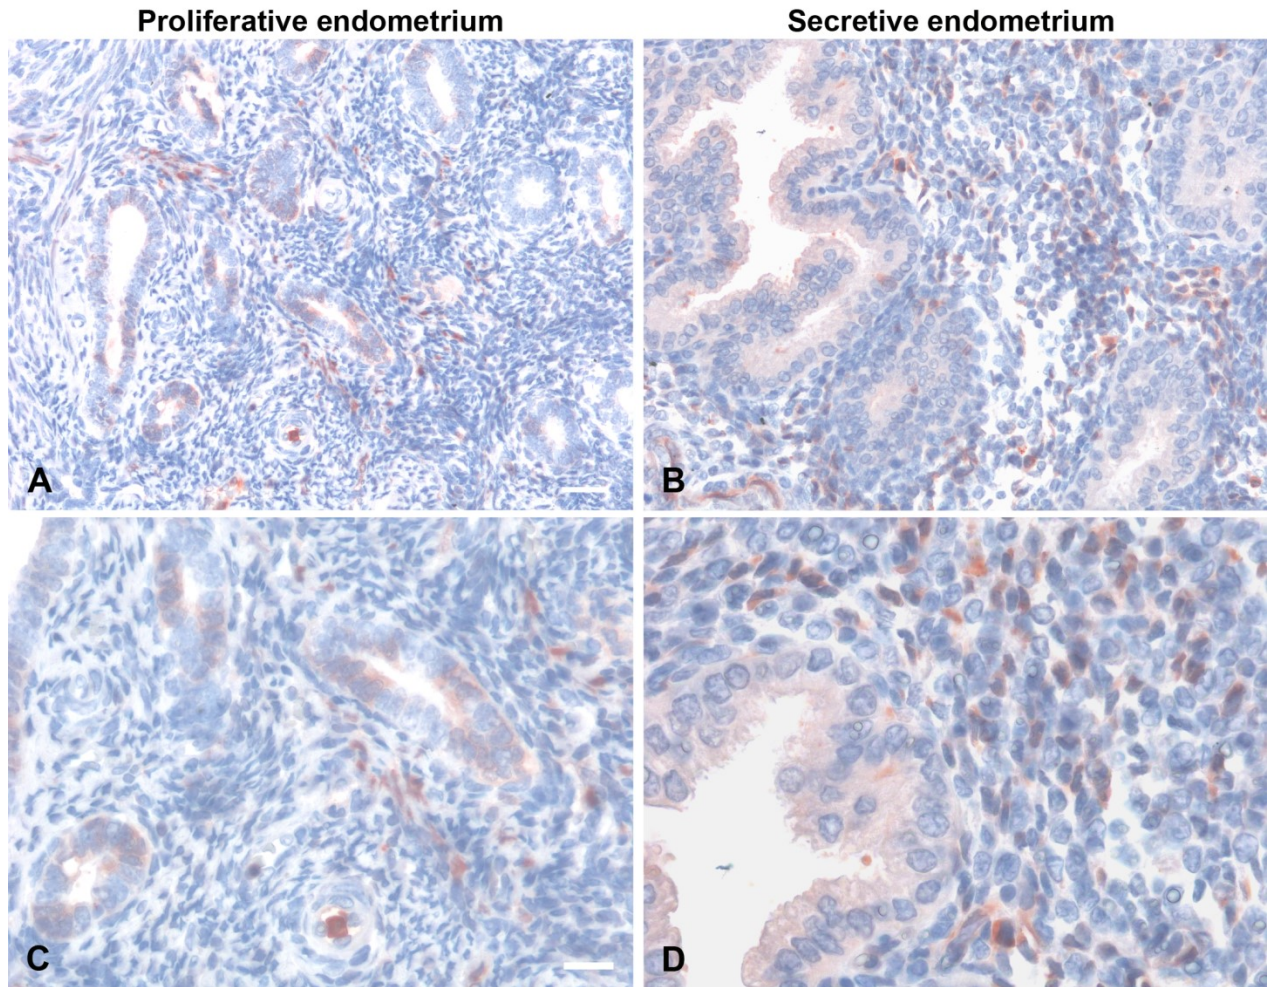

**Supplementary Figure 2.** Representative microphotographs showing C3 IHC staining in proliferative (A, C) and secretive (B, D) endometrium. AEC chromogen was used to visualize the binding of anti-human C3 antibody; (A, B) original magnification 200 x, scale bar 50  $\mu$ m; (C, D) original magnification 400 x, scale bar 100  $\mu$ m.



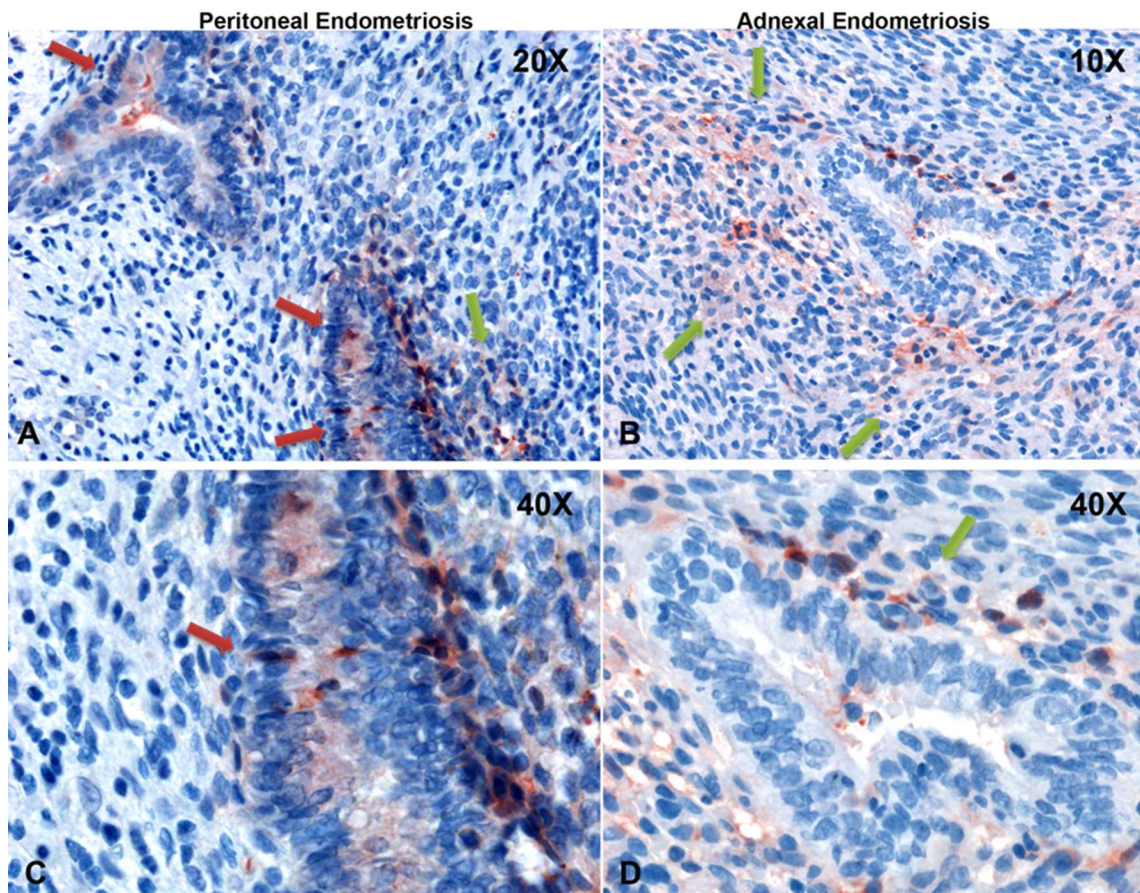

**Supplementary Figure 3. C3 expression by human ectopic endometrial tissue.** Representative microphotographs showing expression of C3 by IHC in abdominal wall (A, C) and adnexal (B, D) endometriosis (EM). Red and green arrows represent C3 positivity, localized in the glandular-like structures and in the cytotrogen stroma, respectively. AEC (red) chromogen was used to visualize the binding of anti-human C3 antibodies. Nuclei were counterstained in blue with Harris Hematoxylin.

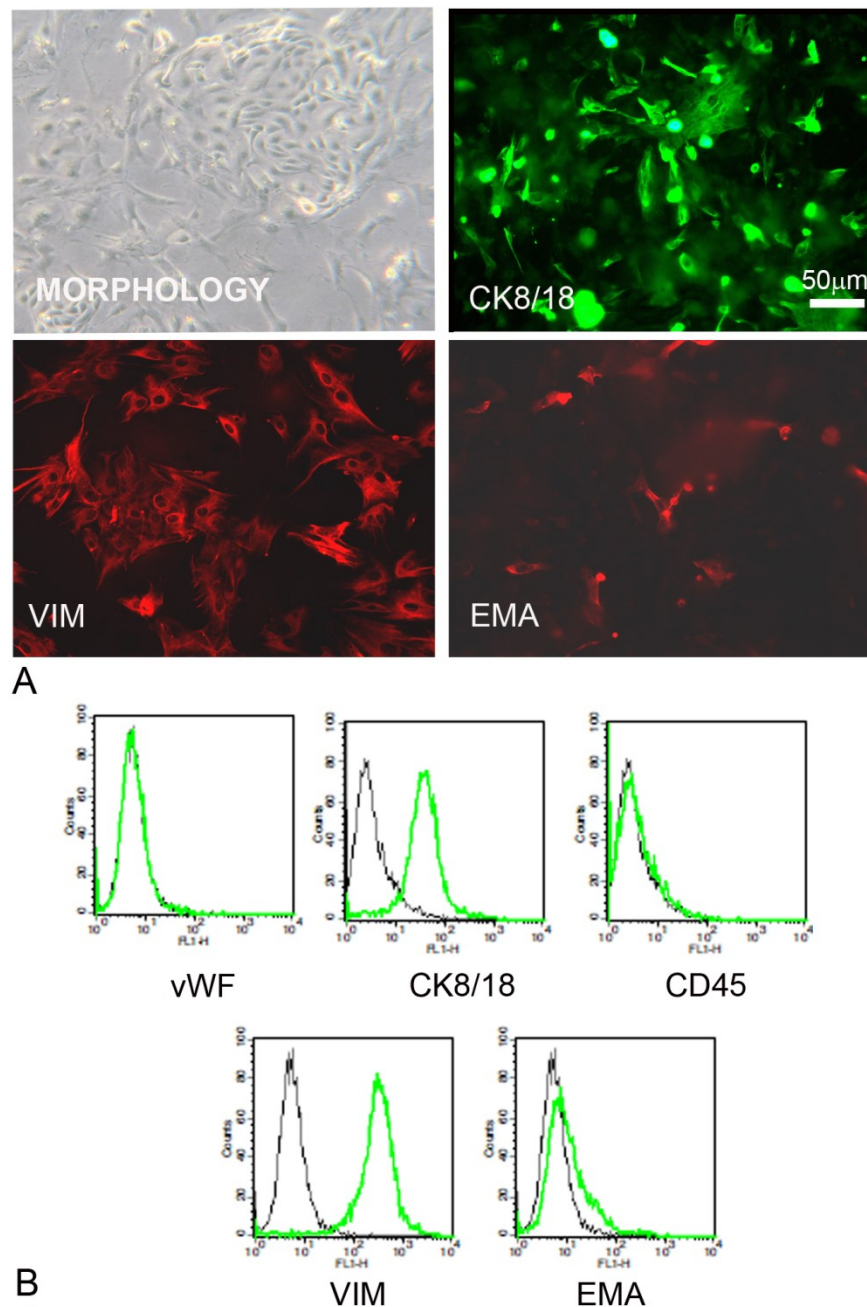

**Supplementary Figure 4.** (A) Morphological features of endometrial cells isolated from EM cyst biopsies. Images were acquired by phase-contrast microscope (Leica original magnification: 200 ×). Endometriotic cells were characterized by immunofluorescence for the expression of cytokeratin 8/18 (CK) in green, vimentin (VIM) and Epithelial Membrane Antigen (EMA) in red. The cells were grown to confluence in 8-chamber culture slides. After fixation and permeabilization, the cells were stained with primary mAb followed by anti-mouse-FITC or Cy3 conjugated F(ab)' secondary antibodies. Original magnification 200 ×. (B) Expressions of von Willebrand Factor (vWF), CK8/18, CD45, VIM and EMA were analyzed by cytofluorimetric analysis. The expression of these markers (green lines) was compared with appropriate control antibodies (black lines).

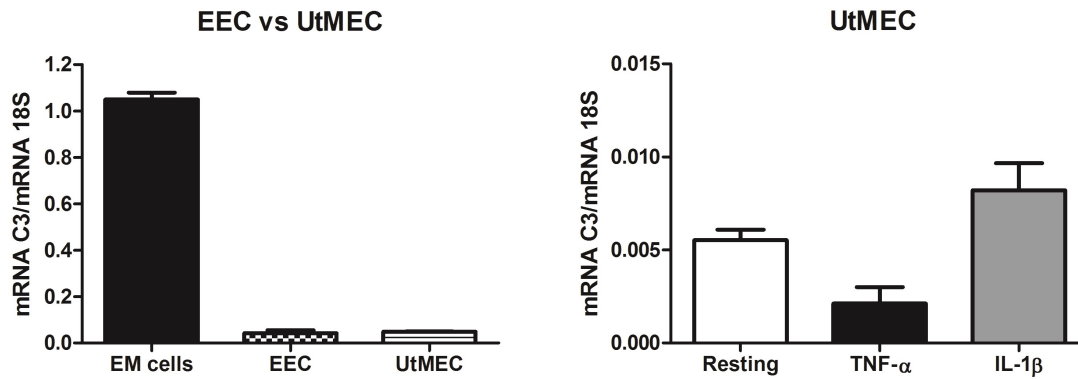

**Supplementary Figure 5.** (A) C3 mRNA expression was evaluated by RT-qPCR in Endometriotic Endothelial Cells (EEC, n = 4) and compared to Uterine Microvascular Endothelial Cells (UtMEC, n = 3). Endometrial cell isolated from EM cyst (EM cells) were used as a calibrator. (B) UtMECs were stimulated overnight with TNF- $\alpha$  (100ng/mL) or IL-1 $\beta$  (5ng/mL), and the C3 expression was analyzed by RT-qPCR. No significant modulation of C3 expression was observed. Data are expressed as mean  $\pm$  standard error.

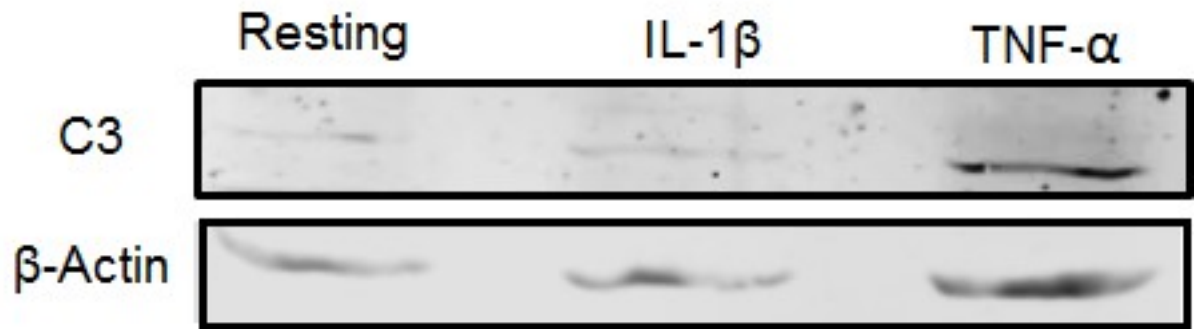

**Supplementary Figure 6.** Stimulation of AN3CA cells with pro-inflammatory cytokines up-regulated C3 expression. AN3CA cells were stimulated overnight with TNF- $\alpha$  (100 ng/mL) or IL-1 $\beta$  (5 ng/mL), and C3 expression was evaluated in cell lysates by western blot (WB) via Odyssey-LICOR scanner.

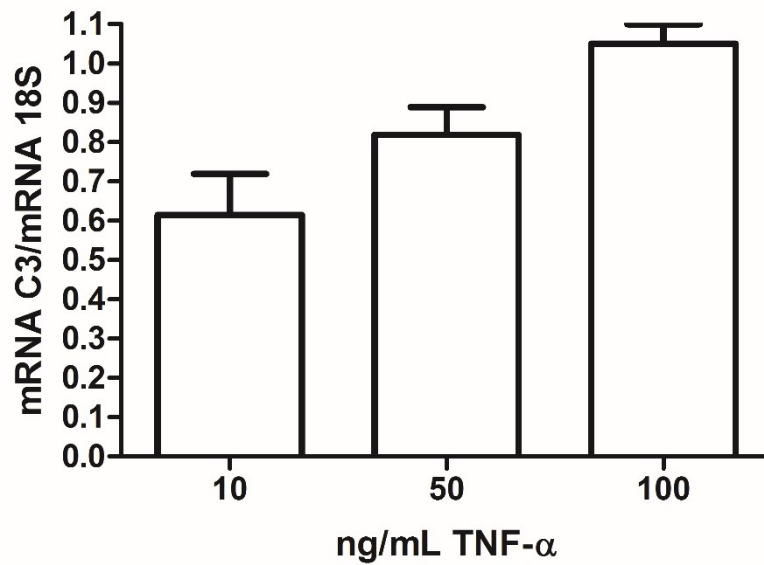

**Supplementary Figure 7.** TNF- $\alpha$  induced expression of C3 mRNA by AN3CA in a dose-dependent manner. C3 mRNA expression was measured by RT-qPCR in AN3CA cells after 24 h stimulation using increasing concentrations of TNF- $\alpha$  (10, 50, 100 ng/mL). Data are expressed as mean  $\pm$  standard error.



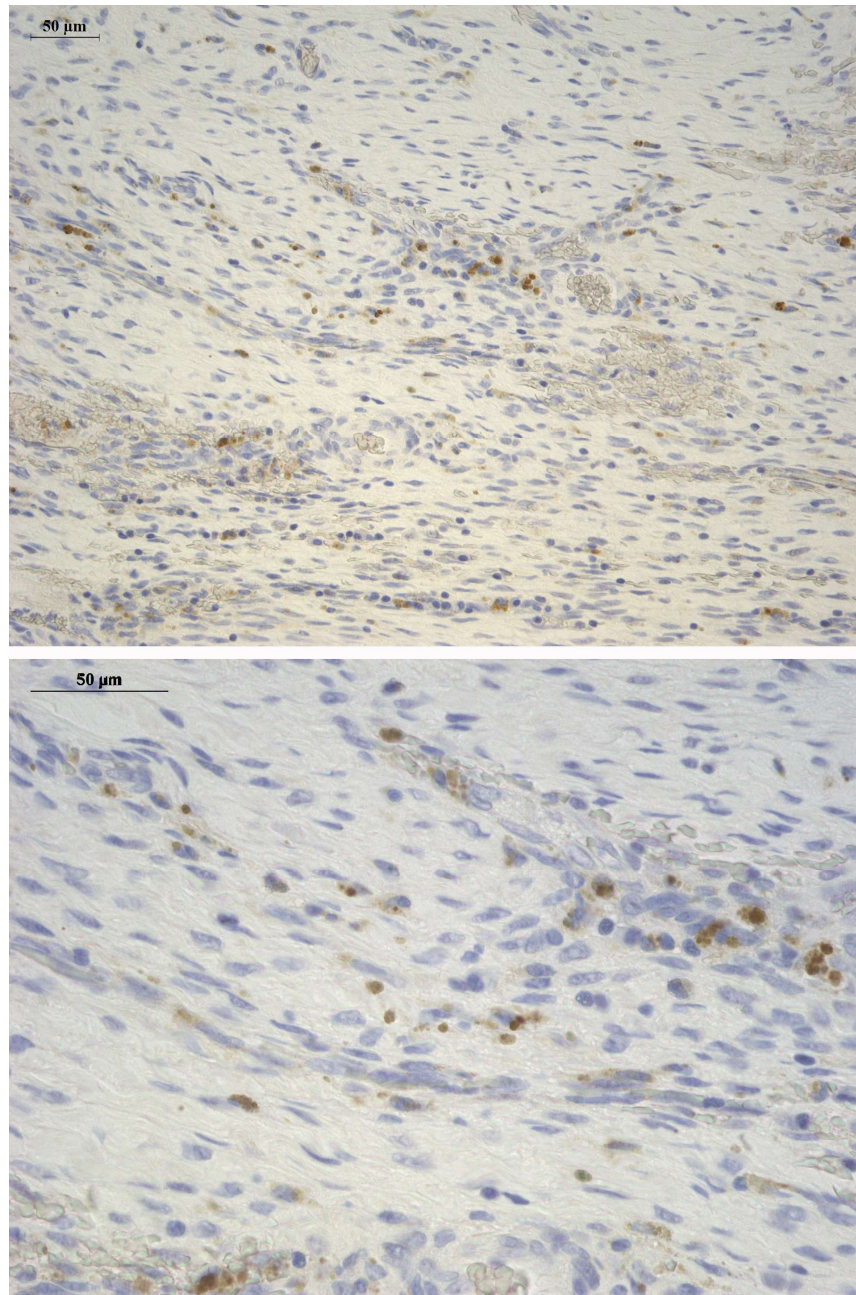

**Supplementary Figure 8. C3aR expression by human ectopic endometrial tissue.** Representative microphotographs showing expression of C3aR by IHC in ovarian EM lesion. DAB (brown) chromogen was used to visualize the binding of anti-human C3aR antibody. Nuclei were counterstained in blue with Harris Hematoxylin. Scale bar 50 µm.



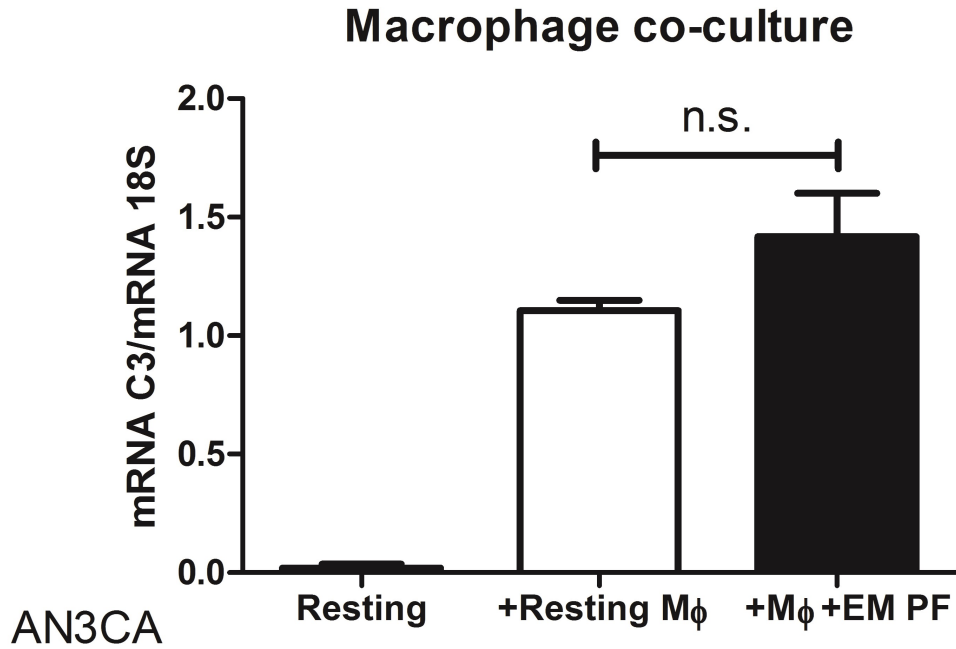

**Supplementary Figure 9.** Co-culture of THP-1 cells [differentiated into macrophage-like phenotype (M $\Phi$ ) by adding 15 ng/mL of PMA] with endometrial cells induced the expression of C3; however, the presence of EM-PF did not increase C3 expression. C3 gene expression was evaluated by RT-qPCR in endometrial AN3CA cells alone (resting conditions) and AN3CA co-cultured with THP-1 alone (+Resting M $\Phi$ ), or with a pool of EM-PF (M $\Phi$  + EM-PF). No statistical differences were observed between the last two conditions.

## 1.2 Supplementary Table

| Gene        | Tm | Sense   | Sequence                | Accession number             |
|-------------|----|---------|-------------------------|------------------------------|
| <b>18 S</b> | 61 | Forward | ATCCCTGAAAAGTTCCAGCA    | <a href="#">NM_022551.2</a>  |
|             |    | Reverse | CCCTCTTGGTGAGGTCAATG    |                              |
| <b>C3</b>   | 61 | Forward | CCTGCTACTAACCCACCTCC    | <a href="#">NM_4557385a1</a> |
|             |    | Reverse | AACAGTGACTGGAACATCCCC   |                              |
| <b>C5</b>   | 60 | Forward | ATGGGCCTTTTGGGAATACTTTG | <a href="#">NM_4502507a1</a> |
|             |    | Reverse | ACATGGCCTGAGGAGTAACTAA  |                              |

Supplementary Table 1. Primers used for RT-qPCR analysis.
